# Supplementary material for: Sulfur Amino Acid Restriction Enhances Exercise Capacity in Mice by Boosting Fat Oxidation in Muscle
Source: PubMed Central journal article supplement — bioRxiv. 2024 Jul 1:2024.06.27.601041. Preprint. [Version 1] doi: 10.1101/2024.06.27.601041 (PMC11244859; doi:10.1101/2024.06.27.601041), 2024-07-01
Supplement: NIHPP2024.06.27.601041v1-supplement-2.pdf [file NIHPP2024.06.27.601041v1-supplement-2.pdf]

845 **Supplemental Figures**

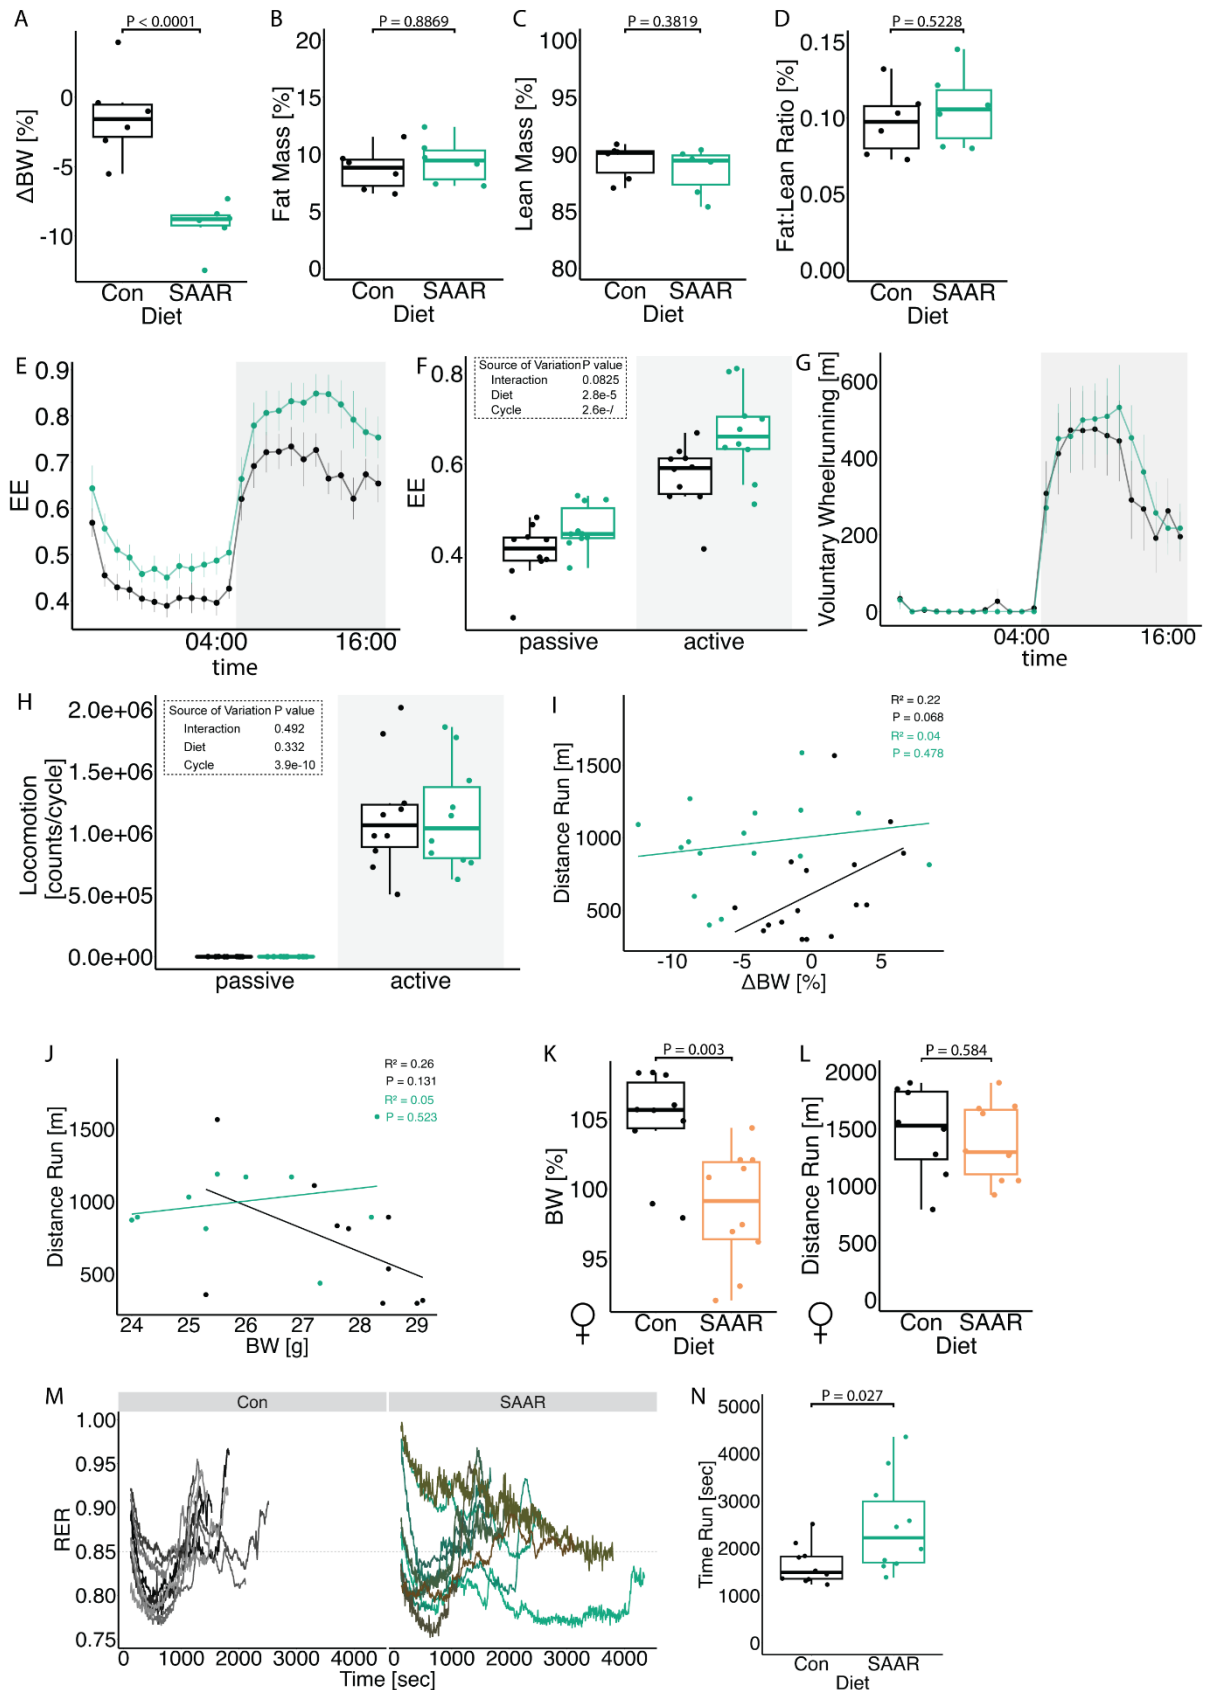

846 **Supplemental Figure 1 Short-term SAAR induces shifts in metabolism and increases**  
 847 **endurance exercise capacity in young, sedentary male mice**

- 848 A. Percent change in body weight (n = 6) of male mice given *ad libitum* access to sulfur  
849 amino acid restricted (SAAR) versus control (Con) diet for seven days.
- 850 B. Percent fat mass of total body weight measured using ECHO MRI (n = 6) of male mice  
851 given *ad libitum* access to SAAR versus Con diet on day seven.
- 852 C. Percent lean mass of total body weight measured using ECHO MRI (n = 6) of male  
853 mice given *ad libitum* access to SAAR versus Con diet on day seven.
- 854 D. Fat:lean mass ratio calculated from A and B (n = 6) of male mice given *ad libitum*  
855 access to SAAR versus Con diet on day seven.
- 856 E. Percent change in body weight (n = 8) of female mice given *ad libitum* access to SAAR  
857 versus Con diet after seven days on the diet.
- 858 F. Distance ran during a one-time maximal endurance test (n = 8) of female mice given  
859 *ad libitum* access to SAAR versus Con diet.
- 860 G. Sable systems indirect calorimetry measurements of energy expenditure (kcal, EE)  
861 over a 24 h period (n = 10) of mice given *ad libitum* access to SAAR versus Con diet  
862 for seven days and
- 863 H. the average EE during a 12 h–12 h light–dark cycle (n = 10) of male mice given *ad*  
864 *libitum* access to SAAR versus Con diet on day seven.
- 865 I. Sable systems indirect calorimetry measurements of sum of beam breaks  
866 (counts/cycle, Locomotion) over a 24 h period (n = 10) of male mice given *ad libitum*  
867 access to SAAR versus Con diet for seven days.
- 868 J. Sable systems indirect calorimetry measurements of voluntary wheel running behavior  
869 over a 24 h period (n = 10) of male mice given *ad libitum* access to SAAR versus Con  
870 diet for seven days.
- 871 K. Linear regression showing the relationship between relative change in body weight  
872 versus distance ran (n = 16) of male mice given *ad libitum* access to SAAR versus Con  
873 diet on day seven. R<sup>2</sup> coefficient was calculated using Pearson’s method.
- 874 L. Linear regression showing the relationship between absolute body weight versus  
875 distance ran (n = 16) of male mice given *ad libitum* access to SAAR versus Con diet  
876 on day seven. R<sup>2</sup> coefficient was calculated using Pearson’s method.
- 877 M. RER trajectory over time in seconds during a one-time maximal endurance test on  
878 metabolic treadmills (Harvard Apparatus) (n = 10) of male mice given *ad libitum* access  
879 to SAAR versus Con diet on day seven.
- 880 N. Time ran in seconds during a one-time maximal endurance test measured on  
881 metabolic treadmills (n = 10) of male mice given *ad libitum* access to SAAR versus  
882 Con diet.

883  
884 All data is shown as mean and error bars indicate SD unless otherwise noted; p values indicate  
885 the significance of the difference by Student’s t test or two-way ANOVA with Sidak’s multiple  
886 comparisons test between diets or diet and cycle (indirect calorimetry); significance is  
887 determined by a p value of p < 0.05. For linear regressions r squared Pearson’s coefficient  
888 was calculated.

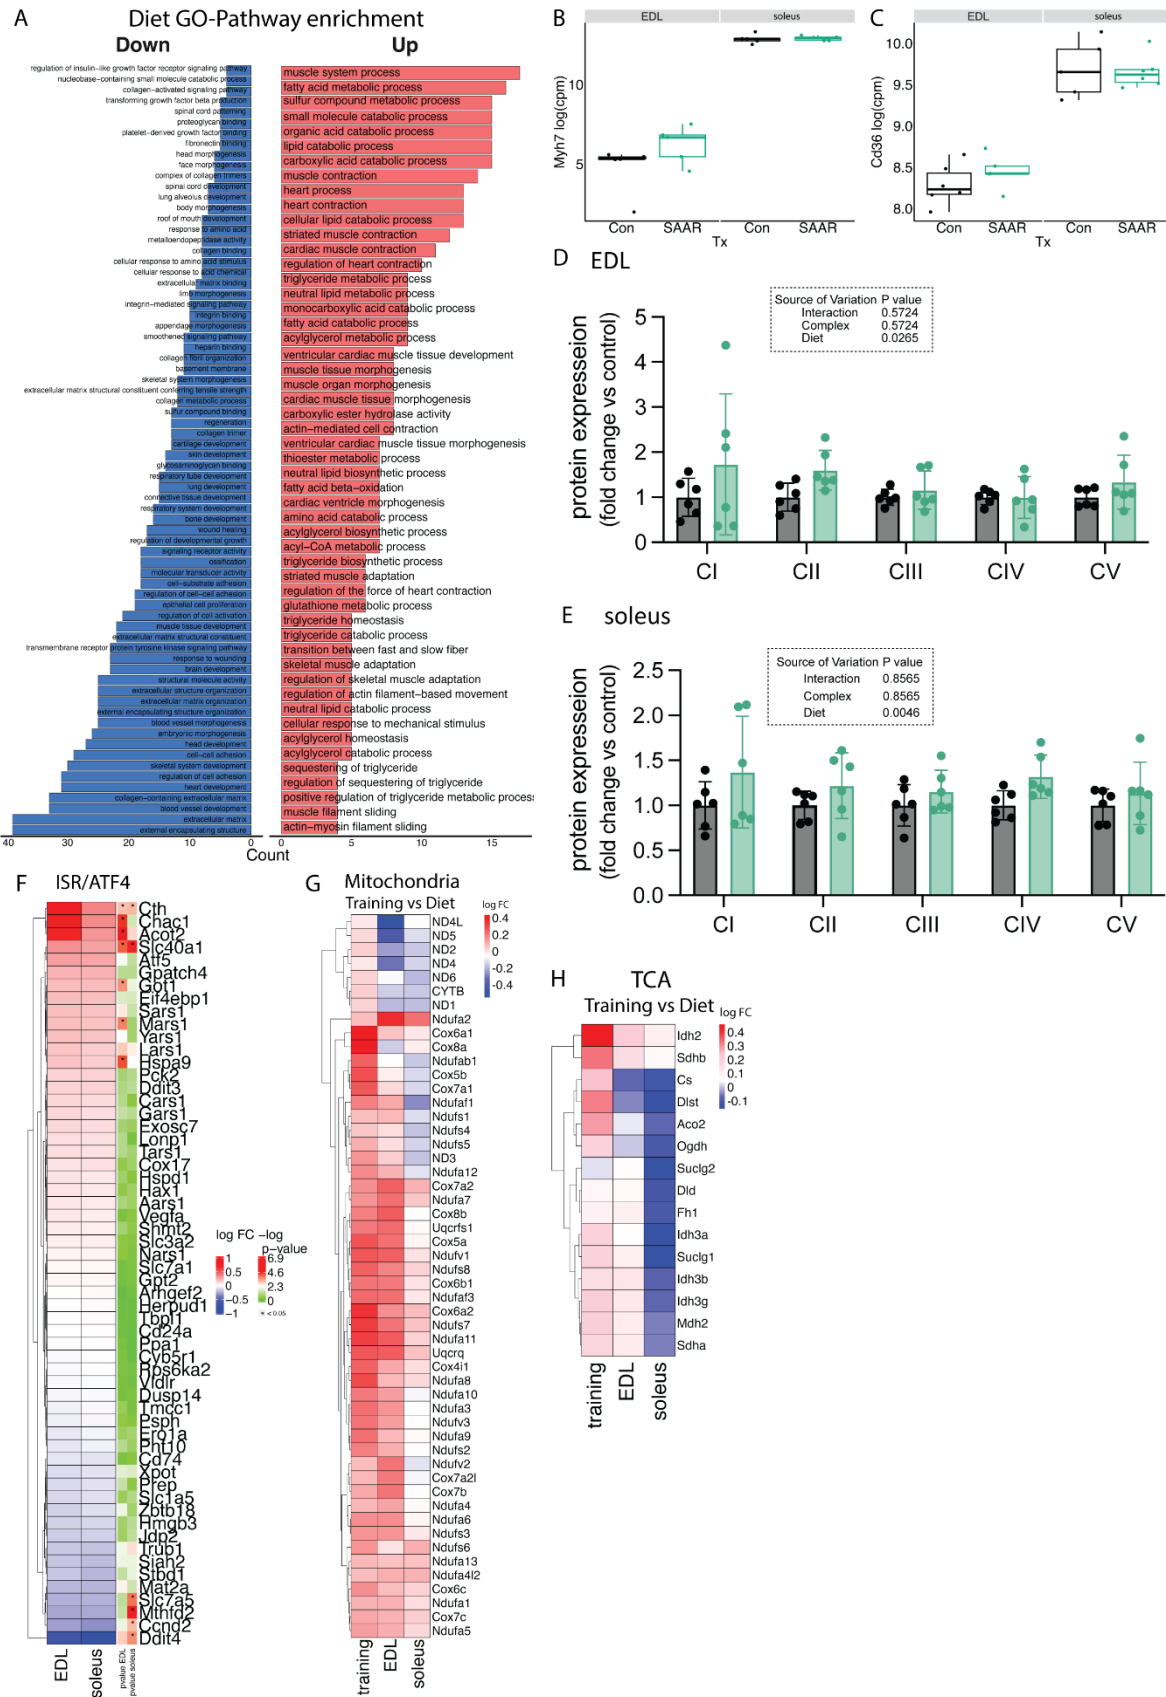

889

890

891

Supplemental Figure 2 Transcriptomics across muscle depots reveal metabolic shift from glycolytic toward oxidative

- 892 A. Pathway enrichment analysis comparing main effects of diet from bulkRNA  
893 sequencing (n = 6) of male mice given *ad libitum* access to sulfur amino acid restricted  
894 (SAAR) versus control (Con) diet on day seven showing all significantly increased or  
895 decreased pathways.
- 896 B. Normalized count values of Myh7 in EDL and soleus from bulkRNA sequencing (n =  
897 6) of male mice given *ad libitum* access to SAAR versus Con diet on day seven.
- 898 C. Normalized count values of Cd36 in EDL and soleus from bulkRNA sequencing (n =  
899 6) of male mice given *ad libitum* access to SAAR versus Con diet on day seven.
- 900 D. Quantification of relative protein abundance normalized to vinculin of all five complexes  
901 of the electron transport chain from blots shown in figure 2E of both EDL and  
902 E. soleus (n = 5).
- 903 F. Fold changes of transcripts associated with known dietary SAAR and integrated stress  
904 response (ISR) target genes (Torrence et al., 2021) after SAAR when compared to  
905 Con.
- 906 G. Fold changes after Training (Furrer et al., 2023) and SAAR when compared to Con of  
907 specific genes associated with mitochondrial matrix.
- 908 H. Fold changes after Training (Furrer et al., 2023) and SAAR when compared to Con of  
909 specific genes associated with TCA cycle as identified in figure 2E.

910 All data is shown as mean and error bars indicate SD unless otherwise noted; p values indicate  
911 the significance of the difference by Student's t test or two-way ANOVA with Sidak's multiple  
912 comparisons test between diets or diet and complexes; significance is determined by a p value  
913 of  $p < 0.05$ .

914

915

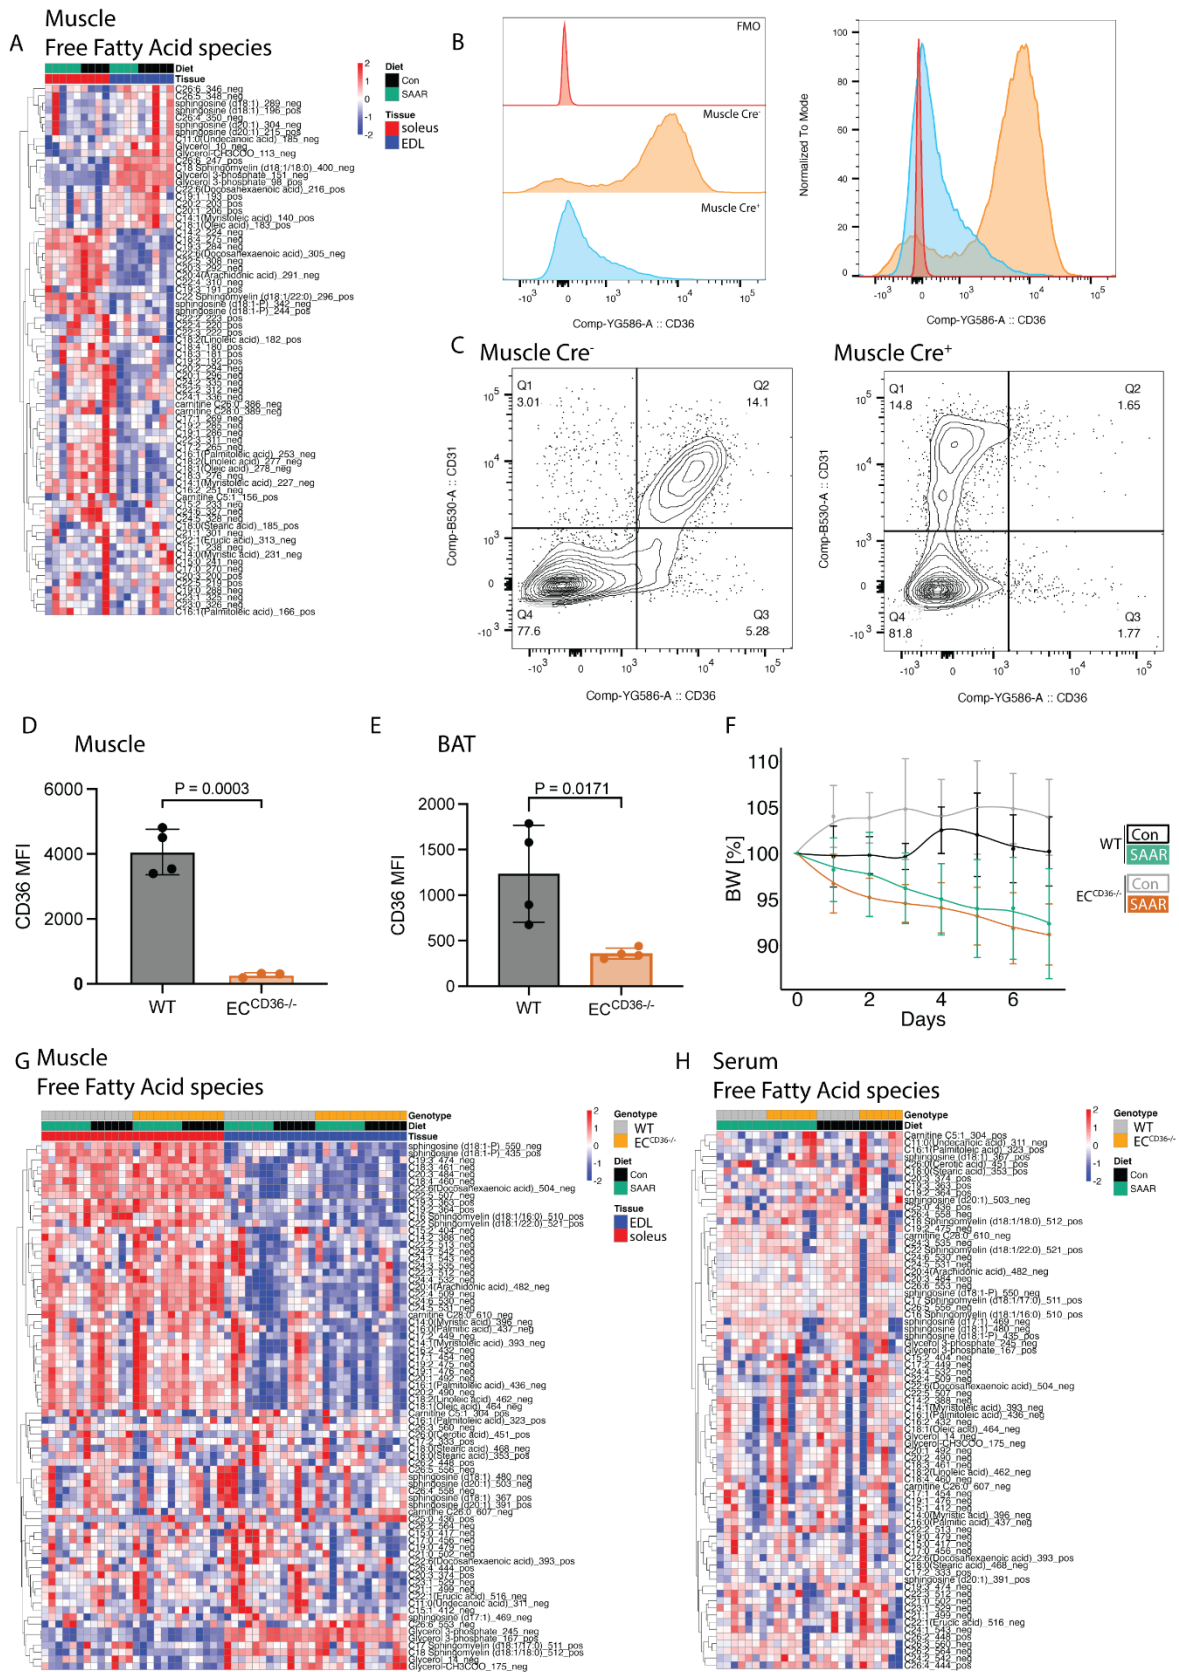

916

917

918

**Supplemental Figure 3 SAAR increases muscle lipid flux without altering lipid pool sizes**

- 919 A. Heatmap of differentially abundant free fatty acid species in muscles (n= 3-4) of male  
920 mice given *ad libitum* access to sulfur amino acid restricted (SAAR) versus control  
921 (Con) diet for seven days.
- 922 B. Representative histograms of CD36<sup>+</sup> endothelial cells (EC) in the muscle and  
923 C. gating strategy for CD36 positive EC (CD45<sup>-</sup>, CD31<sup>+</sup>, CD36<sup>+</sup>) isolated from muscle of  
924 male WT (Cre<sup>-</sup>) and EC<sup>CD36<sup>-/-</sup></sup> (Cre<sup>+</sup>) mice.
- 925 D. EC<sup>CD36<sup>-/-</sup></sup> KO efficiency was confirmed by FACS analysis of CD31<sup>+</sup>/CD36<sup>+</sup> MFI in  
926 muscle or  
927 E. brown adipose tissue (BAT) (n = 4) of male WT or EC<sup>CD36<sup>-/-</sup></sup> mice.
- 928 F. Daily body weight trajectories shown in percent of starting body weight (n = 8/group)  
929 over time of male WT and EC<sup>CD36<sup>-/-</sup></sup> mice given *ad libitum* access to SAAR versus Con  
930 diet for seven days.
- 931 G. Heatmap of differentially abundant free fatty acid species in muscles of male WT or  
932 EC<sup>CD36<sup>-/-</sup></sup> mice (n = 5) fed a Con or SAAR diet for seven days.
- 933 H. Heatmap of differentially abundant free fatty acid species in serum of male WT or  
934 EC<sup>CD36<sup>-/-</sup></sup> mice (n = 5) fed a Con or SAAR diet for seven days.

935

936 All data is shown as mean and error bars indicate SD unless otherwise noted; p values indicate  
937 the significance of the difference by Student's t test between diets, or two-way ANOVA with  
938 Sidak's multiple comparisons test between diets and muscle or genotype; significance is  
939 determined by a p value of p < 0.05.

940

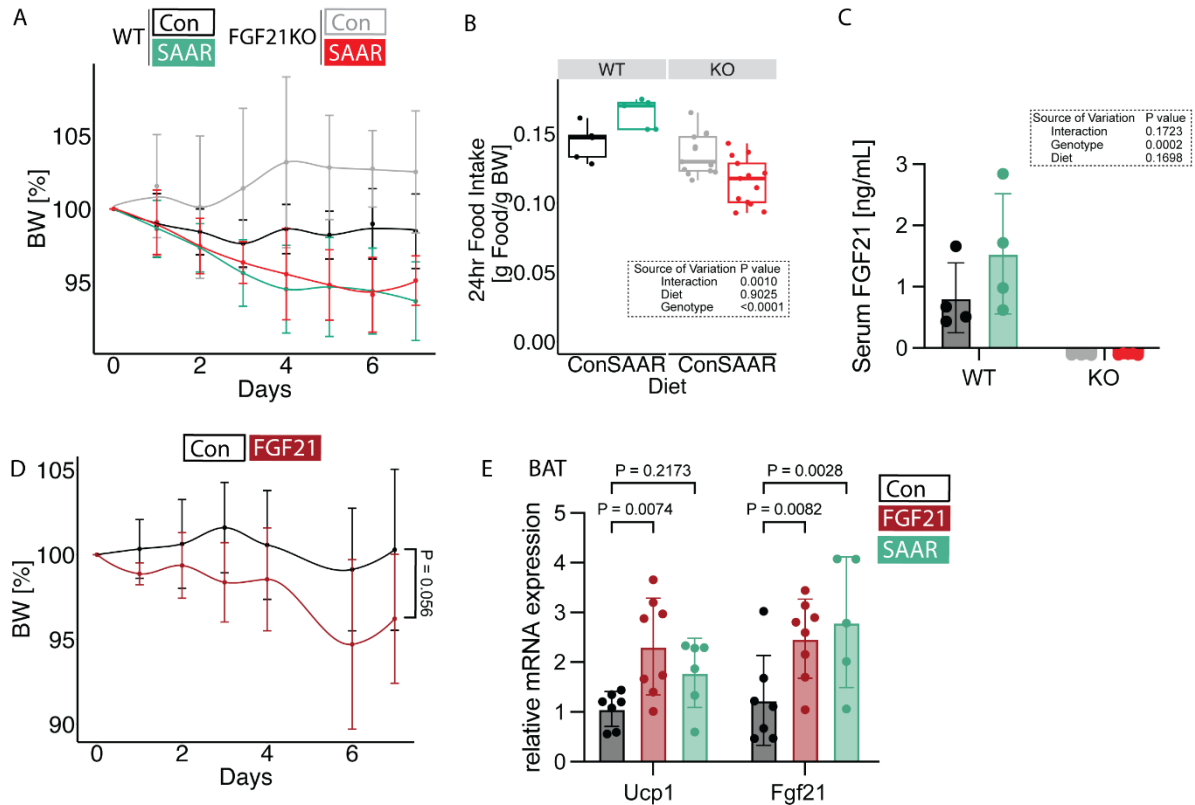

941  
942  
943

### Supplemental Figure 4 FGF21 is dispensable for running phenotype after SAAR in male mice

- 944 A. Daily body weight trajectories shown in percent of starting body weight (n = 4-10) over  
945 time, of male WT or FGF21KO mice given *ad libitum* access to sulfur amino acid  
946 restricted (SAAR) versus control (Con) diet for seven days.  
947 B. Food intake expressed as grams of food eaten per gram of mouse body weight within  
948 a 24 hr period (n = 4-10) of male WT or FGF21KO mice given *ad libitum* access to  
949 SAAR versus Con diet for seven days.  
950 C. Serum FGF21 concentrations of male WT or FGF21 KO mice given *ad libitum* access  
951 to SAAR versus Con diet for seven days determined using an ELISA.  
952 D. Daily body weight trajectories over time shown in percent when compared to starting  
953 body weight (n = 8) of NaCl or recombinant FGF21 treated male mice for seven days.  
954 E. Fgf21 and Ucp1 mRNA levels in brown adipose tissue (BAT) of male mice given *ad*  
955 *libitum* access to SAAR versus Con diet or mice treated with recombinant FGF21 for  
956 seven days

957 All data is shown as mean and error bars indicate SD unless otherwise noted; p values indicate  
958 the significance of the difference by Student's t test between diets, or two-way ANOVA with  
959 Sidak's multiple comparisons test between diets and genotype; significance is determined by  
960 a p value of  $p < 0.05$ .

961

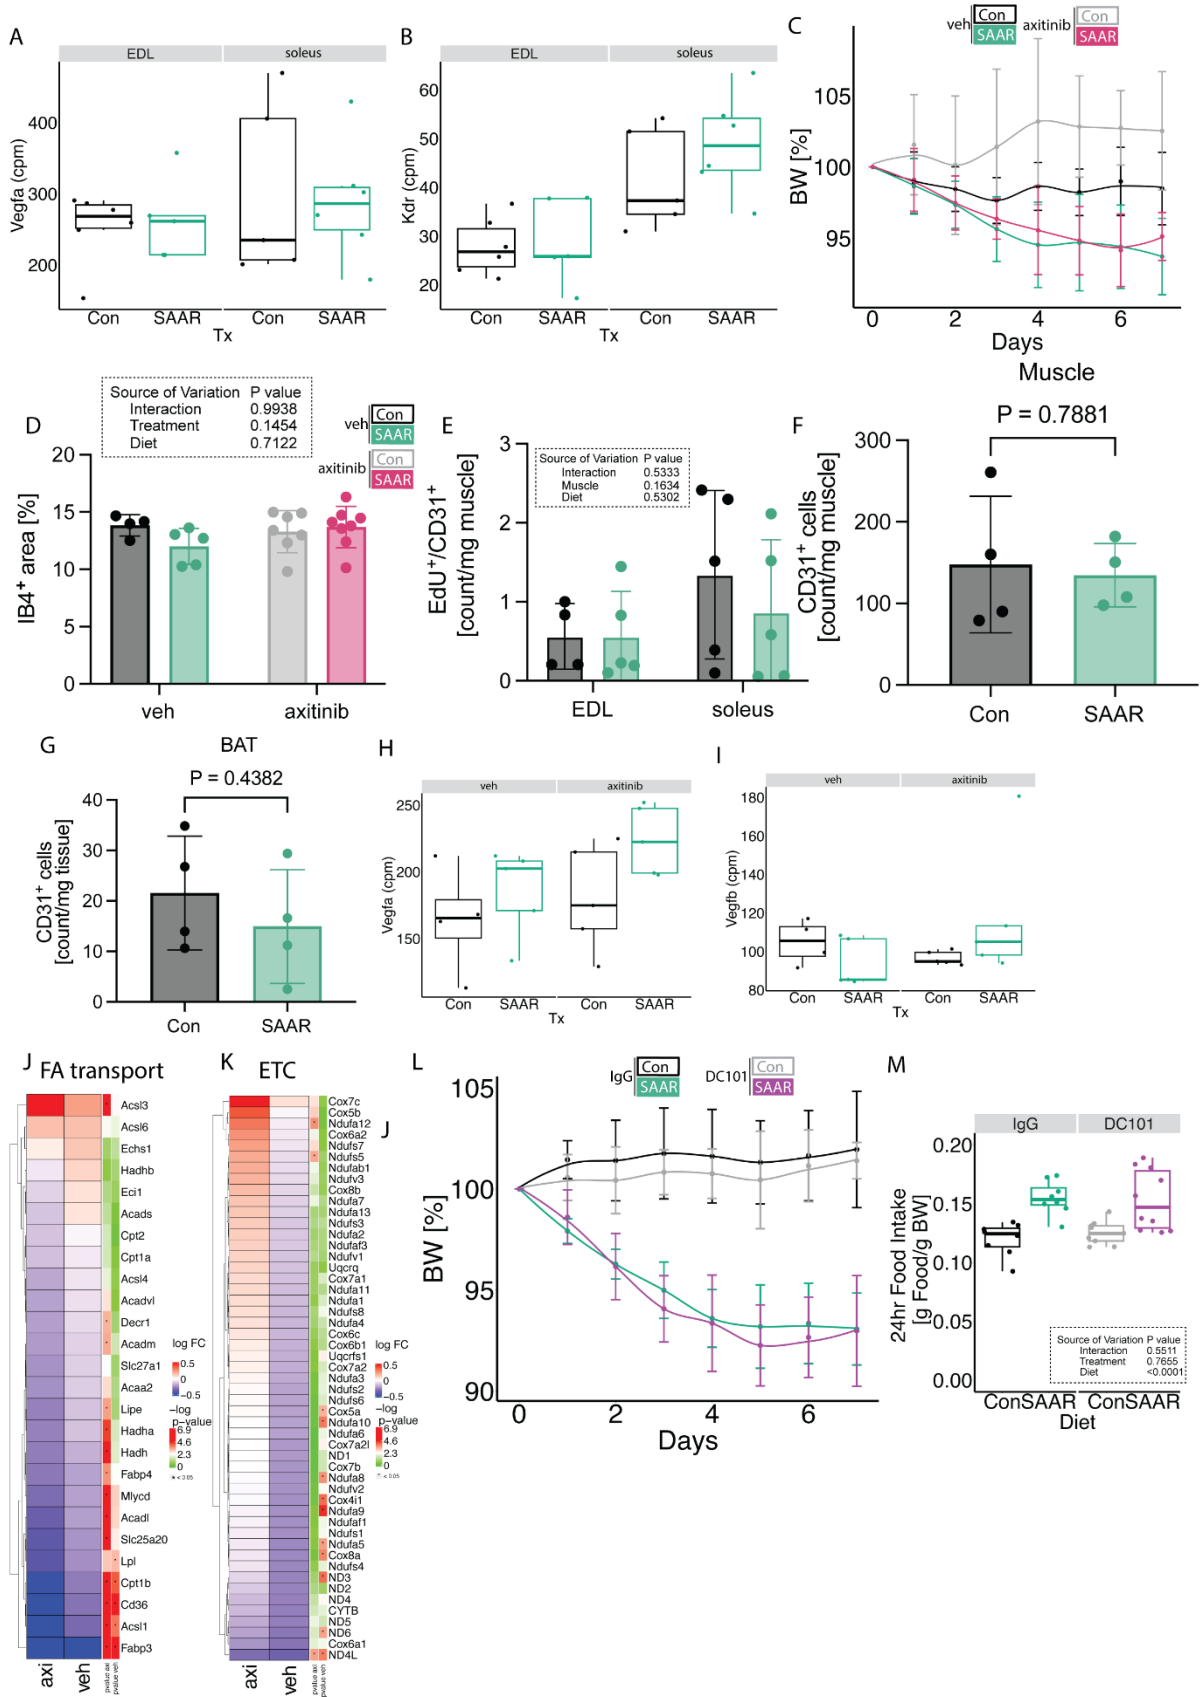

962

963

964

**Supplemental Figure 5 Inhibition of VEGFR signaling prevents endurance exercise phenotype without induction of angiogenesis**



- 965 A. Normalized count values of Vegfa in EDL and soleus from bulkRNA sequencing (n =  
966 6) of male mice given *ad libitum* access to sulfur amino acid restricted (SAAR) versus  
967 control (Con) diet on day seven.
- 968 B. Normalized count values of Kdr in EDL and soleus from bulkRNA sequencing (n = 6)  
969 of male mice given *ad libitum* access to SAAR versus Con diet on day seven.
- 970 C. Daily body weight trajectories shown in percent of starting body weight (n = 10) over  
971 time of male mice given *ad libitum* access to SAAR versus Con diet for seven days,  
972 treated with either vehicle (veh) or axitinib by oral gavage.
- 973 D. Quantification of IB4<sup>+</sup> area of EDL muscle of male mice fed a Con or SAAR for seven  
974 days treated with veh or axitinib (n = 5-8).
- 975 E. Cell counts of EdU<sup>+</sup>/CD31<sup>+</sup> double positive cells per mg tissue in muscle from male  
976 mice given *ad libitum* access to SAAR versus Con diet for seven days and injected  
977 with EdU to label cell proliferation, determined by flow cytometry.
- 978 F. Cell counts of CD31<sup>+</sup> positive cells per mg tissue in muscle or  
979 G. brown adipose tissue (BAT) or of male mice given *ad libitum* access to SAAR versus  
980 Con diet for seven days, determined by flow cytometry.
- 981 H. Normalized count values of Vegfa in EDL treated with veh or axitinib from bulkRNA  
982 sequencing (n = 5) of male mice given *ad libitum* access to SAAR versus Con diet on  
983 day seven.
- 984 I. Normalized count values of Kdr in EDL treated with veh or axitinib from bulkRNA  
985 sequencing (n = 5) of male mice given *ad libitum* access to SAAR versus Con diet on  
986 day seven.
- 987 J. Fold changes of transcripts associated with fatty acid (FA) catabolism and transport as  
988 identified in supplementary figure 2A in both EDL treated with veh or axitinib after  
989 bulkRNA sequencing (n = 5) of male mice given *ad libitum* access to SAAR versus  
990 Con diet on day seven.
- 991 K. Fold changes of transcripts associated with electron transport chain (ETC) associated  
992 genes in EDL treated with veh or axitinib after bulkRNA sequencing (n = 6) of male  
993 mice given *ad libitum* access to SAAR versus Con diet on day seven.
- 994 L. Body weight trajectory over time, shown as percent of starting body weight (n = 8-10)  
995 of male mice given *ad libitum* access to SAAR versus Con diet for seven days treated  
996 with IgG or DC101 via i.p. injection every other day.
- 997 M. Food intake expressed as grams of food per gram of body weight per mouse within a  
998 24 hr period (n = 8-10) of male mice given *ad libitum* access to SAAR versus Con diet  
999 treated with IgG or DC101 via i.p. injection every other day on day seven.

1000 All data is shown as mean and error bars indicate SD unless otherwise noted; p values indicate  
1001 the significance of the difference by Student's t test between diets, or two-way ANOVA with  
1002 Sidak's multiple comparisons test between diets and muscle or treatment; significance is  
1003 determined by a p value of  $p < 0.05$ .

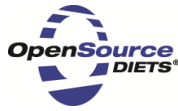

A17101101-03

Formulated by  
Research Diets, Inc  
12/14/2022

| Product #                  | A17101101       | A17101102       | A17101103       |
|----------------------------|-----------------|-----------------|-----------------|
| Ingredient                 | Control         | Mid Methionine  | Low Methionine  |
| Casein, Lactic             | 0               | 0               | 0               |
| L-Cystine                  | 0               | 0               | 0               |
| L-Isoleucine               | 7.6             | 7.6             | 7.6             |
| L-Leucine                  | 15.8            | 15.8            | 15.8            |
| L-Lysine                   | 13.2            | 13.2            | 13.2            |
| L-Methionine               | 4.5             | 1.8             | 1.2             |
| L-Phenylalanine            | 8.4             | 8.4             | 8.4             |
| L-Threonine                | 7.2             | 7.2             | 7.2             |
| L-Tryptophan               | 2.1             | 2.1             | 2.1             |
| L-Valine                   | 9.3             | 9.3             | 9.3             |
| L-Histidine-HCl-H2O        | 4.6             | 4.6             | 4.6             |
| L-Alanine                  | 5.1             | 5.1             | 5.1             |
| L-Arginine                 | 6               | 6               | 6               |
| L-Aspartic Acid            | 12.1            | 12.1            | 12.1            |
| L-Glutamic Acid            | 38.2            | 38.2            | 38.2            |
| Glycine                    | 3               | 3               | 3               |
| L-Proline                  | 17.8            | 17.8            | 17.8            |
| L-Serine                   | 10              | 10              | 10              |
| L-Tyrosine                 | 9.2             | 9.2             | 9.2             |
| <b>Total L-Amino Acids</b> | <b>174.1</b>    | <b>171.4</b>    | <b>170.8</b>    |
| Corn Starch                | 506.2           | 506.2           | 506.2           |
| Maltodextrin 10            | 125             | 125             | 125             |
| Sucrose                    | 73.6            | 76.3            | 76.9            |
| Cellulose, BW200           | 50              | 50              | 50              |
| Soybean Oil                | 25              | 25              | 25              |
| Lard                       | 20              | 20              | 20              |
| Mineral Mix S10026         | 10              | 10              | 10              |
| DiCalcium Phosphate        | 13              | 13              | 13              |
| Calcium Carbonate          | 5.5             | 5.5             | 5.5             |
| Potassium Citrate, 1 H2O   | 16.5            | 16.5            | 16.5            |
| Sodium Bicarbonate         | 7.5             | 7.5             | 7.5             |
| Vitamin Mix V10001         | 10              | 10              | 10              |
| Choline Bitartrate         | 2               | 2               | 2               |
| FD&C Blue Dye #1           | 0               | 0.05            | 0               |
| FD&C Yellow Dye #5         | 0.05            | 0               | 0               |
| FD&C Red Dye #40           | 0               | 0               | 0.05            |
| <b>Total</b>               | <b>1038.450</b> | <b>1038.450</b> | <b>1038.450</b> |
| gm                         |                 |                 |                 |
| Protein                    | 174.1           | 171.4           | 170.8           |
| Carbohydrate               | 714.8           | 717.5           | 718.1           |
| Fat                        | 45.0            | 45.0            | 45.0            |
| Fiber                      | 50.0            | 50.0            | 50.0            |
| gm%                        |                 |                 |                 |
| Protein                    | 16.8            | 16.5            | 16.4            |
| Carbohydrate               | 68.8            | 69.1            | 69.2            |
| Fat                        | 4.3             | 4.3             | 4.3             |
| Fiber                      | 4.8             | 4.8             | 4.8             |
| kcal                       |                 |                 |                 |
| Protein                    | 696             | 686             | 683             |
| Carbohydrate               | 2859            | 2870            | 2872            |
| Fat                        | 405             | 405             | 405             |
| <b>Total</b>               | <b>3961</b>     | <b>3961</b>     | <b>3961</b>     |
| kcal%                      |                 |                 |                 |
| Protein                    | 18              | 17              | 17              |
| Carbohydrate               | 72              | 72              | 73              |
| Fat                        | 10              | 10              | 10              |
| <b>Total</b>               | <b>100</b>      | <b>100</b>      | <b>100</b>      |
| kcal / gm                  | 3.8             | 3.8             | 3.8             |

Research Diets, Inc.  
20 Jules Lane  
New Brunswick, NJ 08901 USA  
info@researchdiets.com

A17101101-03.for

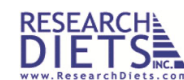

1315  
1316

**Supplemental Table 7 macronutrient composition of the control and SAAR diets used**
